# Supplementary material for: High Levels of Low-Density Lipoproteins Correlate with Improved Survival in Patients with Squamous Cell Carcinoma of the Head and Neck
Source: MDPI journal article supplement (doi:10.3390/biomedicines9050506), 2021-05-04
Supplement: s1 [file s1]

## Supplementary information

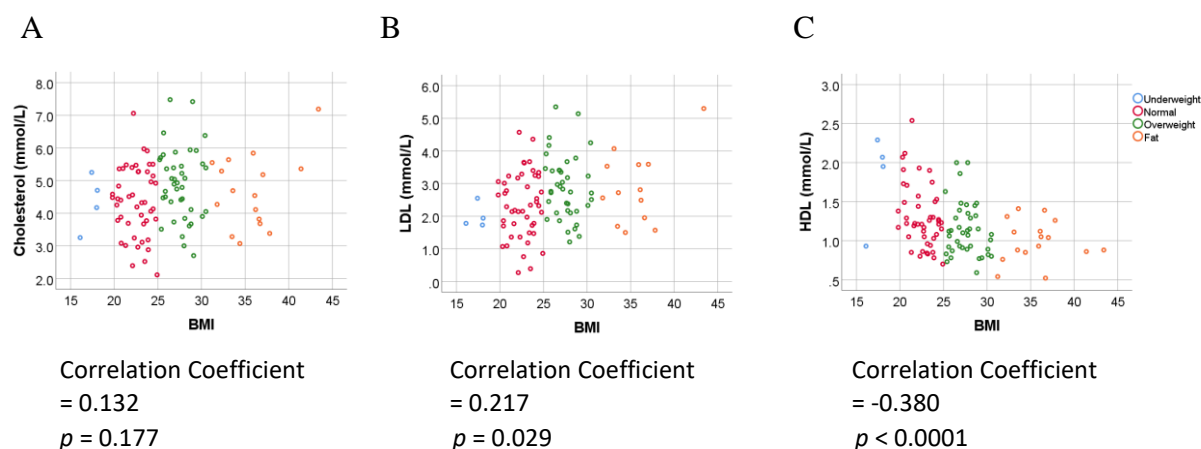

**Figure. S1.** Correlations between body mass index (BMI) and lipoprotein levels. (A) Correlation between BMI and total cholesterol. (B) Correlation between BMI and low-density lipoprotein (LDL). (C) Correlation between BMI and high-density lipoprotein (HDL). Correlation coefficient and  $p$ -values are shown under the scatter plots.

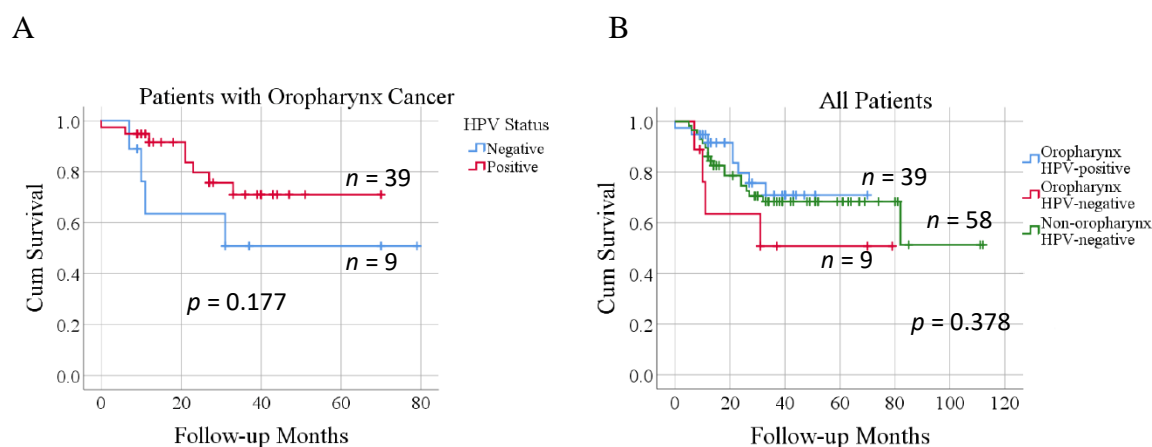

**Figure. S2.** Kaplan–Meier curves showing the impact of HPV status on overall survival. (A) Overall survival status between patients with HPV-negative and HPV-positive oropharynx cancer. (B) Overall survival status among patients with HPV-positive oropharynx, HPV-negative oropharynx or HPV-negative non-oropharynx cancers.
